# Supplementary material for: Material Characterisation of 19–20th Century Manuscripts from Northern Thailand
Source: publisher site journal article supplement (doi:10.1515/res-2023-0028), 2024-09-01
Supplement: Supplementary file 1 [file j_res-2023-0028_suppl_001.pdf]

## Appendix 1

### MS 3

#### Colophon A (fol. 15v)

[Colophon A1 written with black ink in Dhamma script] ได้เขียนหนังสืออินทกุมารนี้แล้วเมื่อจุลศักราชได้ ๑๒๙๑ ตัว ปีกัดไส้ ฤๅได้ ๑ ตัว ยาม ๑๐ โมงเช้าแล '[I] wrote this *Indakumāra* manuscript in CS 1291 (1929 CE), a *kat sai* year, in the first [auspice calculation] time, at 10 a.m.' [written with black ink in Thai script] วันเขียนแล้วเป็นวันที่ ๒๕ สิงหาคม พ.ศ. ๒๔๗๒ และ 'The day, on which the writing was finished, is 25 August 2472 BE (1929 CE) and...'

[Colophon A2 written with blue ink in Dhamma script] จุลศักราชได้ ๑๒๙๑ ตัว ปีกัดไส้ เดือน ๑๑ แรม ๕ ค่ำ ยามกินงายแล้ว ๑๐ นาฬิกาเก่อนเที่ยง ฤๅได้ตัวทลทโทฤๅแล ตัวไม่พอดดีเพราะเขียนก็ฟังเติมที่ ไผๆ ได้เล่าหื้อพิจารณาธุเทอะ 'CS 1291 (1929 CE), a *kat sai* year, on the fifth waning-moon day of the eleventh lunar month, at the breakfast time 10 a.m. before noon, in the Daliddo [auspice calculation] time. [My] handwriting was not well-organized because I rushed it. Those who learn from this manuscript may read it carefully.' [Written with blue ink in Thai script] เขียนแล้ววันที่ ๒๕ สิงหาคม พ.ศ. ๒๔๗๒ 'The writing was done on 25 August 2472 BE.'

[Colophon A3 written with black ink in Dhamma script] พระพุทธศักราชได้ ๒๔๗๒ จุลศักราชได้ ๑๒๙๑ ตัว ปีกัดไส้ เดือน ๑๑ ออก ๔ ค่ำ พร้าว่าไต้หวันเสาร์ ไทยดับเหมา ฤๅได้ ๑๔ ตัวยามอุบาคำน่านองท่วมบ้านท่วมเมืองลำพูน เชียงใหม่ แม่พุทธโธ ไม่เคยเห็นแต่ตั้งแต่เกิดใหญ่ไม่รู้ไม่เห็นน้ำนกอง่างนี้เลย 'In 2472 BE, CS 1291, a *kat sai* year, on the fourth waxing-moon day of the eleventh lunar month, a Saturday, a *dap mao* day in the Thai traditional calendar, in the fourteenth [auspice calculation] time. There is a flood over Lamphun and Chiang Mai. Oh, Lord Buddha, I have never seen such a big flood ever!'

[Colophon A4 written with black pencil in Thai script] คนใดได้อ่านแล้ว ข้าพเจ้าขอเชิญกินเมี่ยงอมหมากสุบบุหรีเสียก่อนแล้ว ขออ่านต่อไปอีกแถมสักหนึ่งบทเทอญ ต้องอ่านตั้งเสียงม่วนๆ ด้วย ให้น้องสาวเข้าฟังหลับแล้วมัดเดี๋ยวก็นำไปหยบนมเข้าด้วยเร็วๆ สัมหีอีก 'I may suggest the readers chew betel nuts and smoke tobacco before reading the next chapter. You are suggested reading the text with such a nice voice that could make young girls fall asleep while listening to it. So, we can squeeze their breasts and pussies. '

#### Colophon B (fol. 22r)

[Colophon B1 written with black ink in Dhamma script] ไผได้อ่านได้เล่า ขอลุงให้พิจารณาเอาพองเทอะ เพราะตัวไม่ดี เขียนก็ฟังเติมทีแล 'Those who read and learn from this

manuscript may consider it carefully because the disorganized handwriting was caused by a hurry. ’

[Mantra written with a pencil in Dhamma script] อมตติ อีอิวันะวอร์ นะวอร์ ว่าหือเถ้าขึ้นธิขึ้นว่านะวอร์ นะวอร์ ‘Amatiti i i wa nawòn nawòn, if the elder begins to recite so, then start (reciting) that: *nawòn nawòn*.’

[Colophon B2 written with a pencil in Dhamma script] คนใดได้อ่านแล้วต้องไปกินเหล้ากับไปต้มบ้านฮาพูนเน้อไปแท้ๆ เน้อ คนใดไปเสียใจแท้ๆ สุร่าอย่างธี ๑ กินแล้วมันแท้ๆ แท้ว่าดีหน่าว่าเหล้าบดาย สูหังหลายจะไปถือฮาเน้อ ฮามันเป็นคนดี เหล้าเสระเปาะแปะพอง พ.ศ. ๒๔๗๗ เดือน ๑๑ ออก ๑๑ คำ ‘Those who read [this manuscript] are suggested drink intoxicant and cook it at his house. [I will be] sad if anyone of you does not join. Drinking intoxicant is pleasant and we can play along. Please do not mind [what he does]. He is a good person and enjoys playing around. (It is written on) the eleventh waxing-day of the eleventh month in the year 2477 BE’ (The date here is equivalent to 11th October 1934 CE)

#### Annotations

[Annotation A written with black ink in Dhamma script on fol. 19v] อ่านถึงตอนนี้สนุกดีปี้เจ็ญต่อไปแถมเดอะ ‘Did you have fun with reading this so far? Please continue reading it.’

[Annotation B written vertically in black ink in Thai script on the top left corner of the folio 23r] ต่อไปนี้เชิญอ่านนางปฐวีต่ออีก ‘Here please continue reading Nang Pathawi.’

[Annotation C written in black ink in Thai script on fol. 27v] บทถ้วน ๒ ต่อไปและ ‘The second chapter is next.’

[Annotation D written in black ink in Thai script on fol. 31r] บทที่ ๓ เชิญอ่านต่อไป สนุกจริงครับ ‘Please continue chapter three. It is really fun.’

## MS 4

### Colophon A (fol. 1r)

[Written with black ink in Dhamma script] ศักราชได้ ๑๒๑๗ ตัว ปีดับเหมา เดือน ๑๐ หุติยะ ออก ๑๒ คำ เมงวัน ๕ ได้ ตัวข้าได้เรียนเอาพระกรรมฐานเจ้าอันประเสริฐนี้ กับครูบาพลวิไชยเมืองกิงมา ท่านก็ต่างพระกรรมฐานเจ้าหือวันนั้นแล ‘CS 1217 (1855 CE), a *dap mao* year, on the twelfth waxing-moon day of the tenth lunar month in the year of double eighth months, the fifth day of the week in the Burmese traditional calendar. I learnt this great *Kammaṭṭhāna* from Khruba Balavijaya in King Ma who instructed me how to meditate.’

### Colophon B (fol. 1v)

[Written with both black ink and black pencil in Dhamma script] black ink: แต่มวัน ๙ คำ ปีรวงไค้ ศักราชได้ ๑๒๑๓ ตัว เดือน ๑๐ แล; black pencil: พับหน่วยนี้ของนายทา บ้านยู เน้อ; black ink: อันนี้ไม้ตัวถูกอักขระพยัญชนะ

กุตวบุคคลผู้ใดตนได้ยังมีศรัทธาจงขึ้นใจเอาไว้ไว้นับแล้ว  
พราเป็นดังเข้าเชื่ออันเลือกไว้นั้นแล

ภาวนาไปตามสติกำลังทะอะ  
ผู้ใดได้จำเรญ

ก็อาจเพื่อได้ถึงสุขชั่วนี้ชั่วหน้าตราบนิพพานธรรมเจ้าแลแล'; black ink: The writing of this manuscript was on the ninth [waxing or waning]-moon day, a *ruang khai* year, CS 1213 (1851 CE), in the tenth lunar month; black pencil: This folded manuscript belongs to Mr. Tha who lives at Ban (village) Yu; black ink: The writing is orthographically correct. Those who are faithful [in this text] may memorize it to pay respect and do meditation. According to beliefs of other people, those who faithfully follow the text will gain eternal happiness until reaching the Nirvana (*nibbāna*).'

## MS 6

Colophon A (fol. 1r)

[Incised inscription filled with black paste in Dhamma script] ศก ๒๕๑๓ ปี ... ศรัทธนางฟอง แก้วน้อย  
ถวายเป็นทานยังกัมมมาจาพุทธพระวินัยอาณูญา, In 2513 BE (1970 CE) 'Nang (Mrs.) Fong Kaenòom was the principal initiator who dedicated this *Kammavācā* manuscript that defines the monastic disciplines regulated by the Buddha.'

## MS 7

Colophon A (fol. 18r)

[Incised inscription filled with black paste in Dhamma script] หน้ารับมาโดย  
ฉบับวังวอนดอนกลางเชียงใหม่ ปางเมื่ออยู่ปฏิบัติวัดทองมานไต้หวันนั้นแล  
เสด็จแล้วแก่ข้ายามกองแลงแลนายเหย จุลศักราชได้ ๑๒๐๖๕ ตัว ปีก่าเหมาแลนายเหย  
หนูกินไถคทุกินกลานาชื่อข้าชื่อว่าอภิชัยสามเณร ปางเมื่ออยู่ปฏิบัติสาธุเจ้านันทา  
วัดทองมานไต้หวันทำทางปางเมื่อสร้างใหม่แล ข้าใครหากแต่มีคำชูพุทธศาสนาแล  
ข้าขอห้อมมีพญาปัญญาอันแล 'Front page of Maleyya, *Wing wòn dòn klang chiang mai* version.  
[The copying of this manuscript was done] during my stay at Thong Man Tai monastery, at the time of the evening drum (*yam kòng laeng*) (15:00–16:30), in CS 12065 (1265), a *ka mao* year.  
[Indistinct phrase]. I am Novice Abhijaya, living at the newly-constructed monastery Wat Thong Man Tai to assist Monk Nandā. I would like to sustain the Buddhist religion and inscribed this manuscript for this reason. May I have wisdom.'
